# Supplementary material for: The Zwitterionic Imidazolium Salt: First Used for Synthesis of 4‐Arylidene‐2‐phenyl‐5(4H)‐oxazolones under Solvent‐Free Conditions
Source: Hindawi journal article supplement (doi:10.1155/2013/280585), 2013-01-01
Supplement: f1 [file 280585.f1.doc]

Supplementary data

4-[(4-Dimethylaminophenyl)methylene]-2-phenyl-5(4H)-oxazolone(4a)(C18H16O2N2): red solid, M.p. 210-213℃(Lit.[25] M.p. 212-213℃); 1H NMR (400 MHz, CDCl3) δ = 3.11 (s, 6 H, CH3), 7.22 (s, 1 H, -CH=), 7.49-7.56 (m, 5 H, ArH), 8.14-8.21 (t, 4 H, J = 6.8 Hz, ArH). IR (KBr) 3420, 2918, 1762(-C=O), 1602, 1380, 1162 cm-1. Mass (m/z): 292, 249, 159, 143, 105.

4-(1,3-Benzodioxol-5-ylmethylene-2-phenyl-5(4H)-oxazolone(4b)(C17H11O4N): yellow solid, M.p. 197-199℃(Lit.[30] M.p. 200℃); 1H NMR (400 MHz, CDCl3) δ = 6.079 (s, 2 H, CH2), 6.19-6.91 (m, 1 H, J = 8.0 Hz, ArH), 7.17 (s, 1 H, -CH=), 7.26 (s, 1 H, ArH), 7.46 (d, 2 H, J = 8.0 Hz, ArH), 7.51-7.55 (t, 1 H, J = 7.6 Hz, ArH), 7.60 (d, 1 H, J = 7.2 Hz, ArH), 8.12-8.18 (t, 2 H, J = 12.0 Hz, ArH). IR (KBr) 3431, 1781(-C=O), 1647, 1450, 1384, 1264, 1167 cm-1. Mass (m/z): 293, 160, 105.

4-[(4-Methoxyphenyl)methylene]-2-phenyl-5(4H)-oxazolone(4c)(C17H13O3N): yellow solid, M.p. 155-156℃(Lit.[25] M.p. 156℃); 1H NMR (400 MHz, CDCl3) δ = 3.90 (s,3 H, CH3), 7.00-7.02 (m, 2 H, J = 8.8 Hz, ArH) 7.25 (s, 1 H, -CH=), 7.51-7.62 (m, 3 H, ArH), 8.17-8.22 (t, 4 H, J = 8.4 Hz, ArH). IR (KBr) 3424, 2918，1785(-C=O), 1648, 1602, 1384, 1260, 1163 cm-1. Mass (m/z): 279, 146, 135, 105, 77.

4-[(4-Methylphenyl)methylene]-2-phenyl-5(4H)-oxazolone(4d)(C17H13O2N): yellow solid, M.p. 143-144℃(Lit.[25] M.p. 141-143℃); 1H NMR (400 MHz, CDCl3) δ = 2.24 (s, 3 H, CH3), 7.26 (d, 1 H, J = 4.4 Hz, -CH=), 7.52-7.56 (m, 5 H, ArH), 8.16 (d, 4 H, J = 8.0 Hz, ArH). IR (KBr) 3427, 2923, 1793(-C=O), 1653, 1384, 1158 cm-1. Mass (m/z): 263, 130, 105, 77.

4-Phenyl-4-(phenylmethylene)-5(4H)-oxazolone(4e): M.p. 168-169℃(Lit.[25] M.p. 168℃); 1H NMR (400 MHz, CDCl3) δ = 7.27 (s, 1 H, -CH=), 7.48-7.63 (m, 6 H, ArH), 8.19-8.23 (m, 4 H, ArH). IR (KBr) 3420, 1793(-C=O), 1653, 1384, 1167 cm-1. Mass (m/z): 249, 116, 105, 89.

4-[(4-Chlorophenyl)methylene]-2-phenyl-5(4H)-oxazolone(4f)(C16H10O2NCl): yellow solid, M.p. 186-187℃ (Lit.[25] M.p. 184℃); 1H NMR (400 MHz, CDCl3) δ = 7.20 (s, 1 H, -CH=), 7.45-7.64 (m, 5 H, ArH), 8.15-8.20 (m, 4 H, ArH). IR (KBr) 3420, 1797(-C=O), 1653, 1384, 1158 cm-1. Mass (m/z): 283, 150, 105, 77.

4-[(2-Fluorophenyl)methylene]-2-phenyl-5(4H)-oxazolone(4g)(C16H10O2NF): yellow solid, M.p. 165.5-166.5℃(Lit.[31] M.p. 165.5-166.5℃); 1H NMR (400 MHz, CDCl3) δ = 7.15 (t, 1 H, J = 9.2 Hz, -CH=), 7.26-7.32 (m, 1 H, ArH), 7.44-7.64 (m, 5 H, ArH), 8.20 (d, 2 H, J = 7.6 Hz, ArH), 8.88-8.92 (t, 1 H, J = 7.4 Hz, ArH). IR (KBr) 3431, 1789 (-C=O), 1657, 1556, 1384，1202, 1166 cm-1. Mass (m/z): 267, 134, 105, 77.

4-[(4-Trifluoromethylphenyl)methylene]-2-phenyl-5(4H)-oxazolone(4h)(C17H10O2NF3): yellow solid, M.p. 172-174℃(Lit.[32] M.p. 173-174℃); 1H NMR (400 MHz, CDCl3) δ = 7.25 (d, 1 H, J = 9.6 Hz, -CH=), 7.54-7.58 (t, 2 H, J = 7.8 Hz, ArH), 7.64-7.67 (t, 1 H, J = 7.4 Hz, ArH), 7.73 (d, 2 H, J = 8.0 Hz, ArH), 8.26 (d, 4 H, J = 8.0 Hz, ArH). IR (KBr) 3424, 1801(-C=O), 1657, 1556, 1384, 1331, 1167 cm-1. Mass (m/z): 317, 134, 105.

4-[(4-Nitrophenyl)methylene]-2-phenyl-5(4H)-oxazolone(4i)(C16H10O4N2): yellow solid, M.p. 240-241℃ (Lit.[25] M.p. 241℃); 1H NMR (400 MHz, CDCl3) δ = 7.25 (d, 1 H, J = 8.0 Hz, -CH=), 7.56-7.69 (m, 3 H, ArH), 8.23 (d, 2 H, J = 8.0 Hz, ArH), 8.36 (d, J = 8.8 Hz, 4 H, ArH). IR (KBr) 3431, 1797(-C=O), 1653, 1599, 1556, 1345, 1163 cm-1. Mass (m/z): 294, 105, 77.

4-(2-Furanylmethylene)-2-phenyl-5(4H)-oxazolone(4j)(C14H9O3N): brown solid, M.p. 170-172℃(Lit.[25] M.p. 171-172℃); 1H NMR (400 MHz, CDCl3) δ = 6.66 (d, 1H, J = 1.2 Hz, -CH=), 7.19 (s, 1H, -CH=), 7.51-7.61 (m, 4H, ArH and -CH=), 7.68 (d, 1H, J = 0.8 Hz, -CH=), 8.16 (d, 2H, J = 7.6 Hz, ArH). IR (KBr) 3431, 1789(-C=O), 1653, 1556, 1462, 1384, 1229, 1158 cm-1. Mass (m/z): 239, 105, 77.
